# Supplementary material for: Genetic and Pharmacological Blockade of Sigma-1 Receptors Attenuates Inflammation-Associated Hypersensitivity during Acute Colitis in CD1 Mice
Source: MDPI journal article supplement (doi:10.3390/biomedicines11102758), 2023-10-12

# **Genetic and pharmacological blockade of Sigma-1 receptors attenuates inflammation-associated hypersensitivity during acute colitis in CD1 mice**

**Sergio López-Estévez, Mònica Aguilera, Georgia Gris, Beatriz de la Puente, Alicia Carceller and Vicente Martínez**

**Supplementary Material**

**Figure S1.** Histopathological assessment of the colon. A-D: Representative microphotographs showing hematoxylin and eosin-stained colonic slices from WT vehicle-treated mice (A), DSS-treated WT mice (B),  $\sigma$ 1R KO vehicle-treated mice (C) and DSS-treated  $\sigma$ 1R KO mice (D). Notice the submucosal edema observed in DSS-treated WT mice (B), while it was markedly reduced in DSS-treated  $\sigma$ 1R KO mice (D). Scale bar: 200  $\mu$ m.

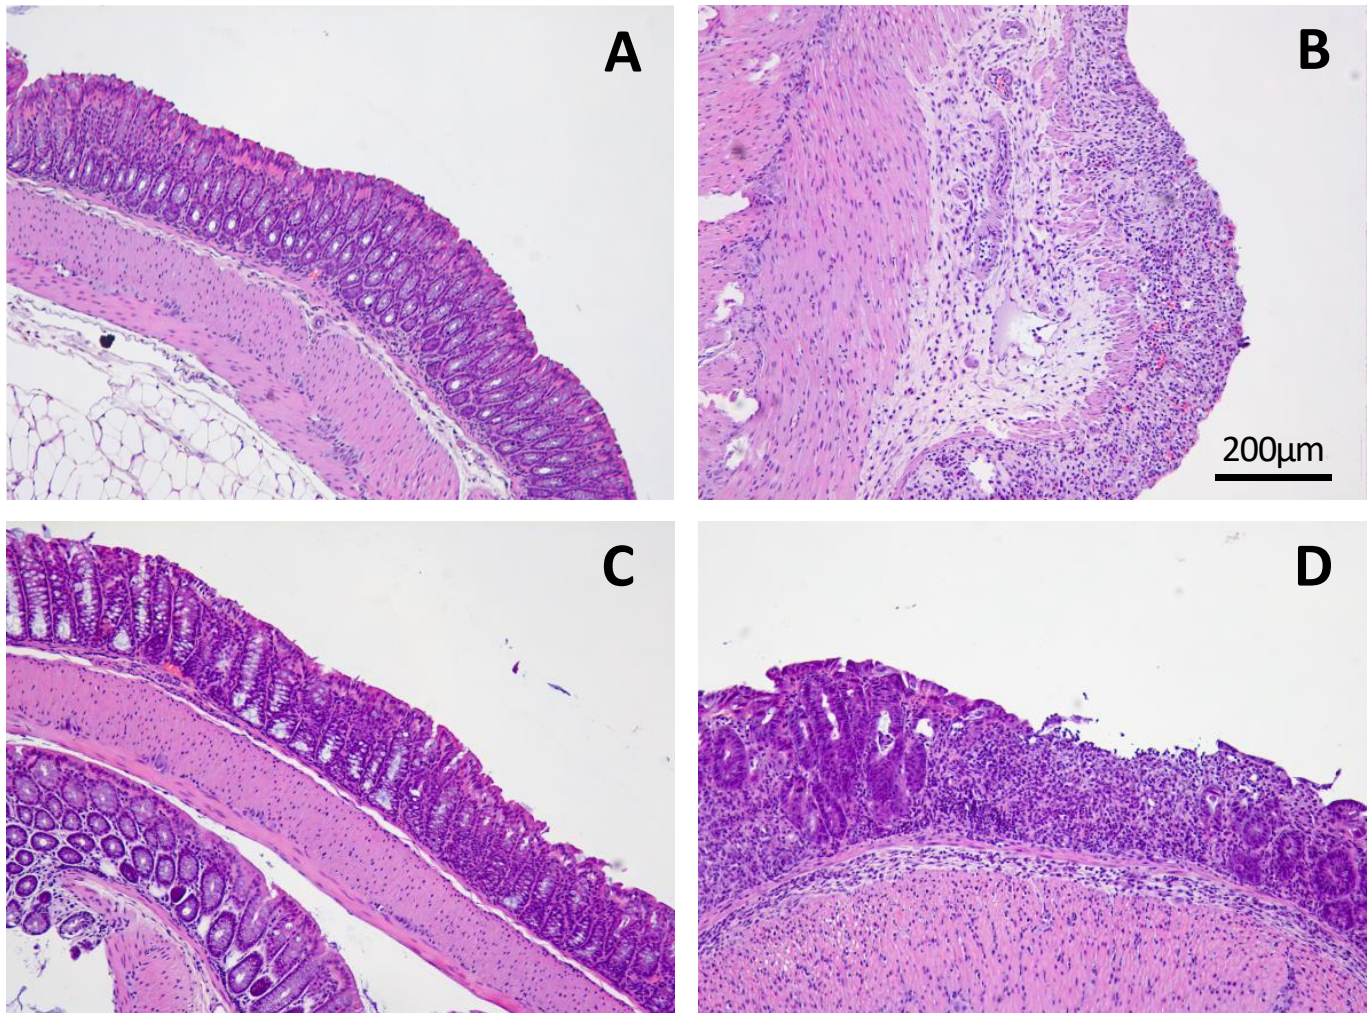

**Figure S2.** Colonic gene expression of  $\sigma$ 1Rs in WT and  $\sigma$ 1R KO CD1 mice. No expression was detected in  $\sigma$ 1R KO mice. Each point represents an individual animal; the horizontal bar with errors represents the mean $\pm$ SEM.

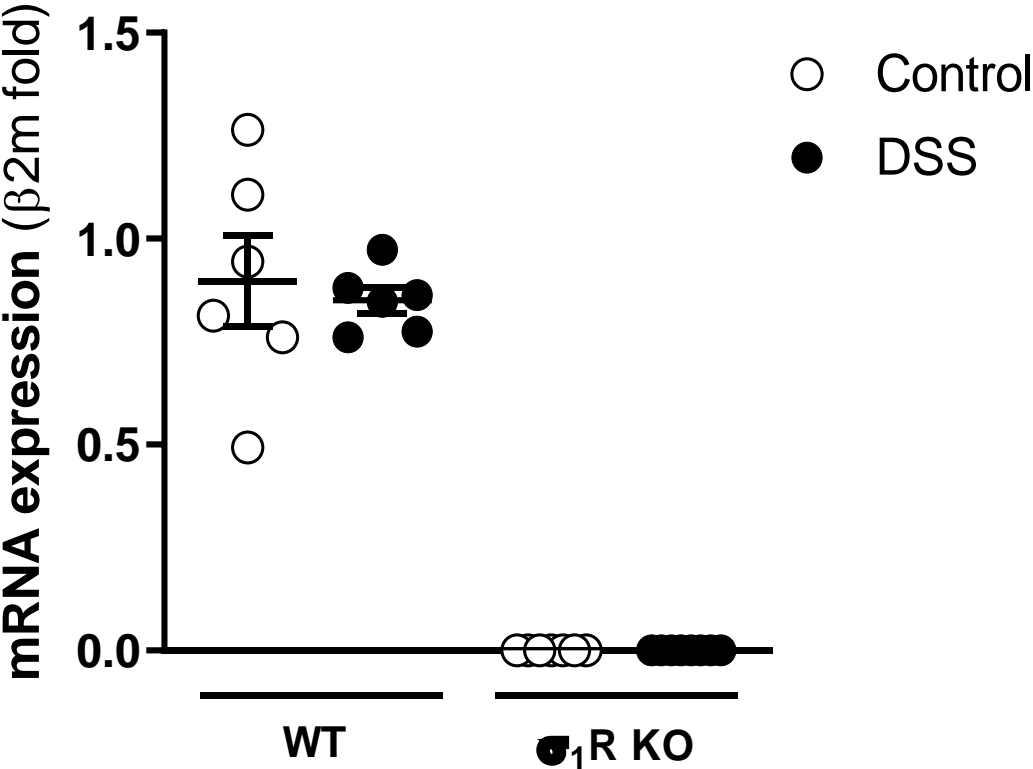

**Figure S3.** Relative levels of pERK (A), pCaMKII (B), pp38 (C) and GFAP (D) in the lumbosacral spinal cord of WT and  $\sigma_1$ R KO CD1 mice with or without colitis. Data are mean $\pm$ SEM of 6-8 animals per group.

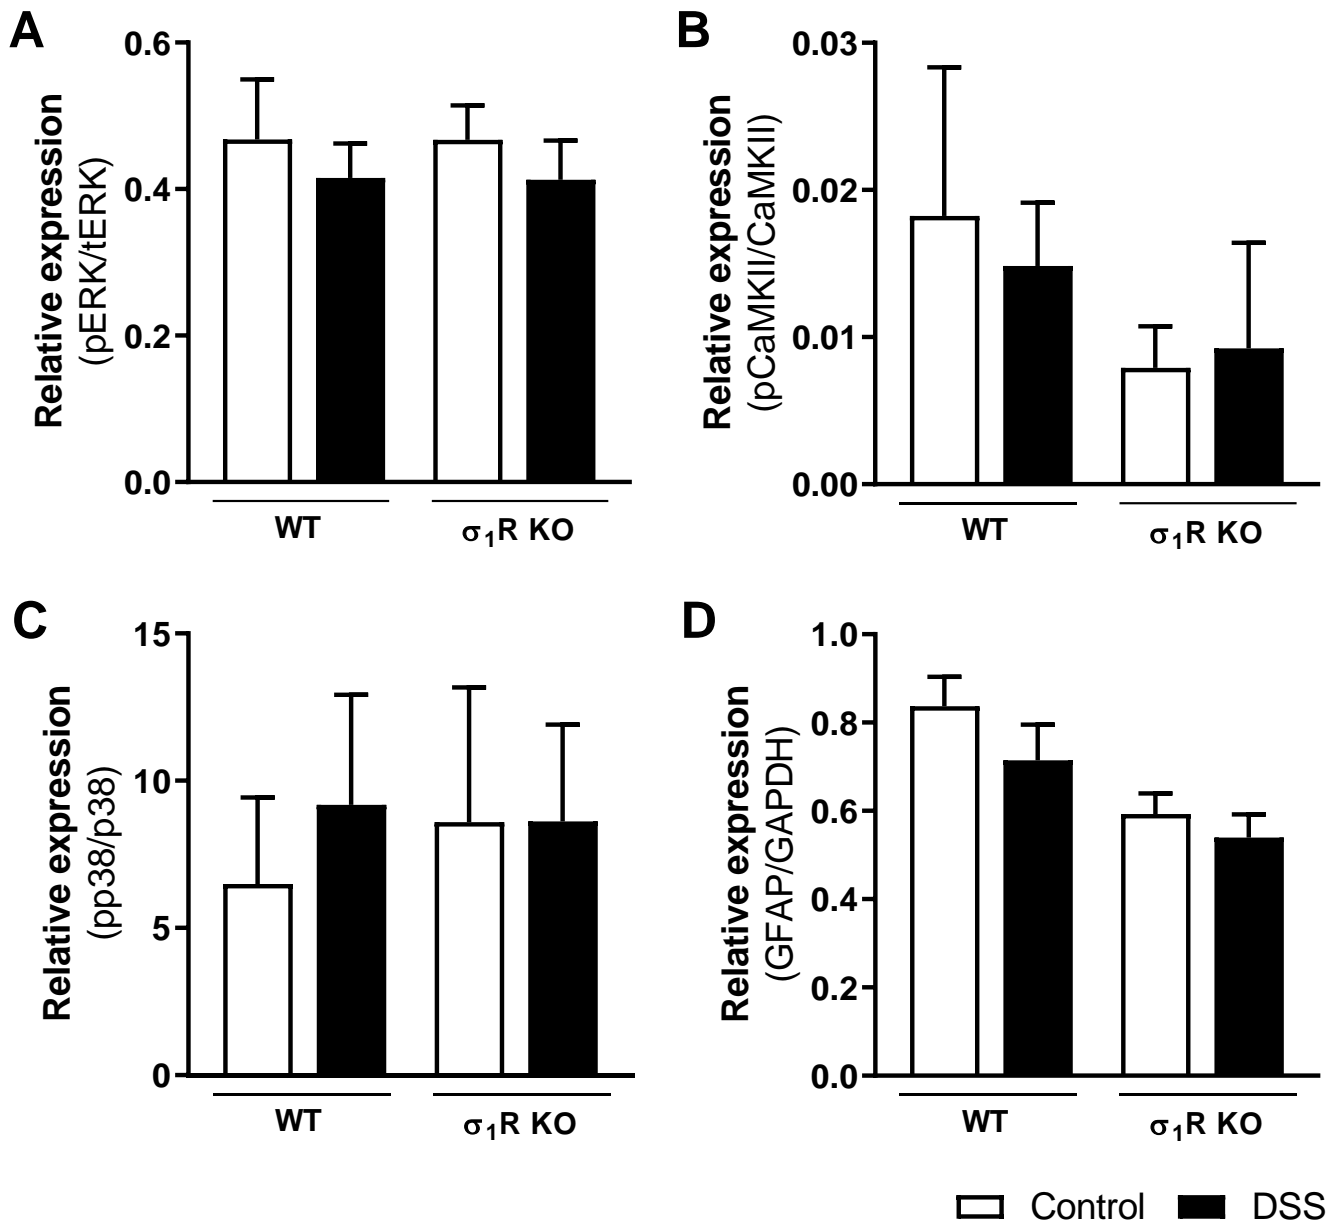

**Figure S4.** Effects of  $\sigma$ 1R antagonists (BD1063 or E-52862), 6-TG and 5-ASA on colonic gene expression of  $\sigma$ 1Rs. Each point represents an individual animal; the horizontal bar with errors represents the mean $\pm$ SEM.

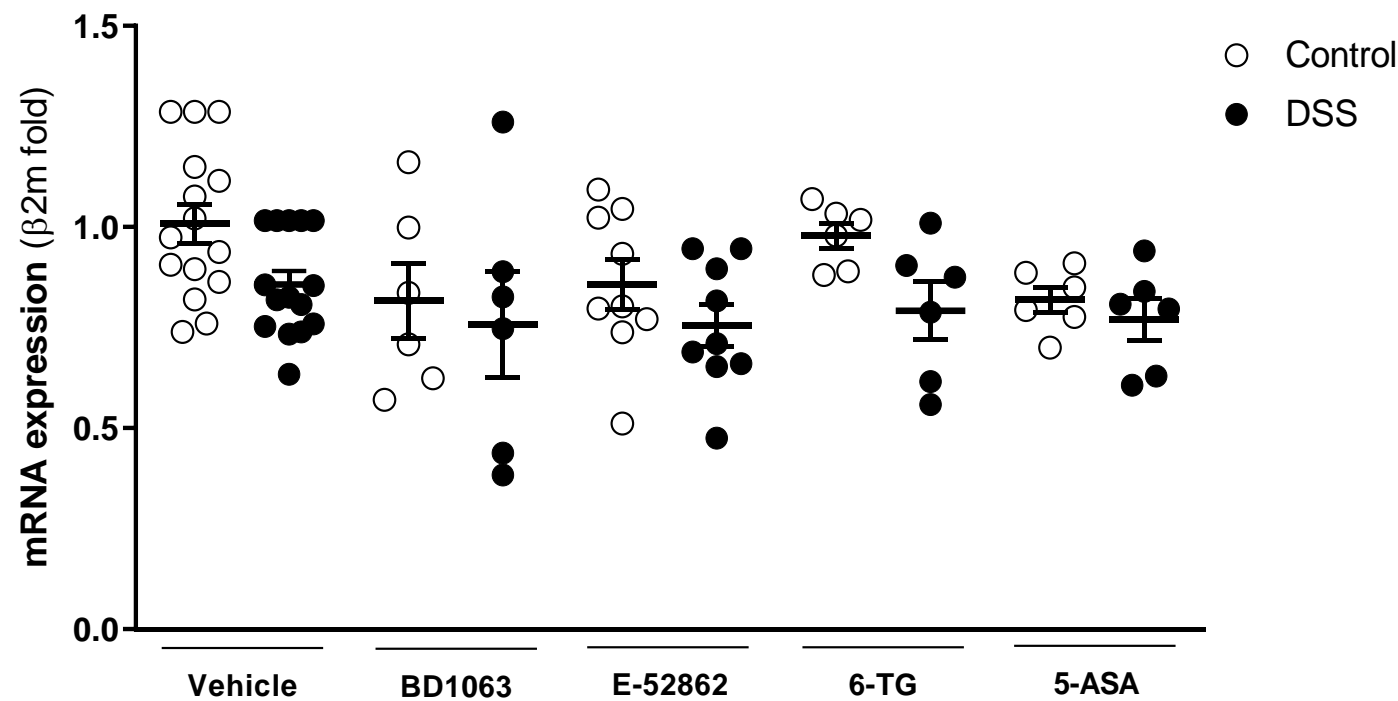

Supplement: s1 [file s1]
